# Supplementary material
Source: MDPI journal article supplement (https://www.mdpi.com/2571-6255/5/3/64)
Supplement: s1 [file s1]

## Supplementary Information

**Table SI-1.** Regulatory stations and their operating agencies.

| Station Name                       | Agency                          | Elevation (m) |
|------------------------------------|---------------------------------|---------------|
| Bakersfield-California Avenue      | California Air Resources Board  | 119           |
| Clovis-N Villa Avenue              | San Joaquin Valley Unified APCD | 113           |
| Corcoran-Patterson Avenue          | San Joaquin Valley Unified APCD | 63            |
| Fresno - Garland                   | California Air Resources Board  | 97            |
| Hanford-S Irwin Street             | San Joaquin Valley Unified APCD | 82            |
| Huron - 4th Street                 | San Joaquin Valley Unified APCD | 118           |
| Lebec                              | San Joaquin Valley Unified APCD | 1069          |
| Madera City                        | San Joaquin Valley Unified APCD | 88            |
| Manteca AMS                        | San Joaquin Valley Unified APCD | 11            |
| Merced - Coffee Road               | San Joaquin Valley Unified APCD | 56            |
| Modesto-14th Street                | California Air Resources Board  | 33            |
| Porterville                        | San Joaquin Valley Unified APCD | 141           |
| San Andreas-Gold Strike Road       | California Air Resources Board  | 300           |
| Sequoia National Park-Ash Mountain | National Park Service (NPS)     | 515           |
| Stockton-Hazelton                  | California Air Resources Board  | 10            |
| Tracy - Airport                    | San Joaquin Valley Unified APCD | 65            |
| Tranquility                        | San Joaquin Valley Unified APCD | 63            |
| Turlock-S Minaret Street           | San Joaquin Valley Unified APCD | 32            |
| Visalia                            | California Air Resources Board  | 102           |
| Yosemite Village - Visitor Center  | California Air Resources Board  | 1222          |

**Table SI-2.** Performance of considered sensor correction models for the collocated data.

| Correction Model:                                                              | R2   |
|--------------------------------------------------------------------------------|------|
| PA= Purple Air Concentrations                                                  |      |
| PM2.5=Station Observations                                                     |      |
| i and s1-7 are constant calculated from fitted data                            |      |
| $PM2.5 = s1*PA + i$                                                            | 0.87 |
| $PM2.5 = s1*PA + s2*RH + i$                                                    | 0.89 |
| $PM2.5 = s1*PA + s2*RH + s3*T + i$                                             | 0.89 |
| $PM2.5 = s1*PA + s2*RH + s3*RH*PA + i$                                         | 0.90 |
| $PM2.5 = s1*PA + s2*RH + s3*T + s4*PA*RH + s5*PA*T + s6*RH*T + s7*PA*RH*T + i$ | 0.90 |

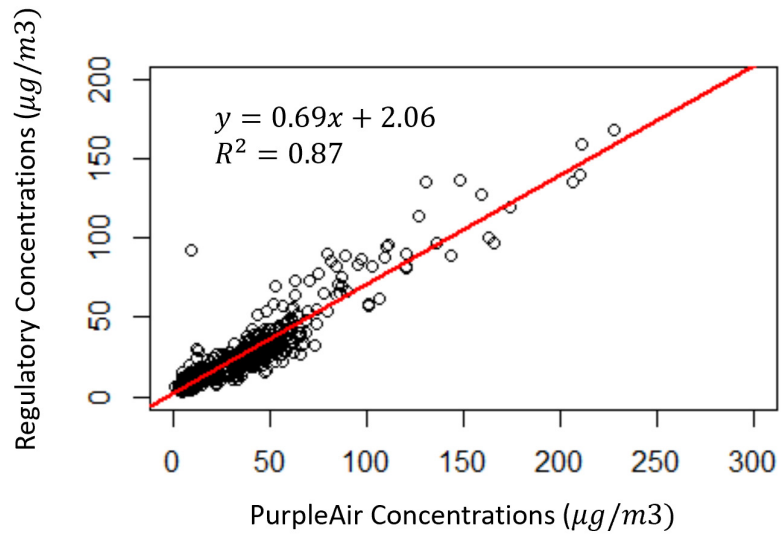

**Figure SI-1.** Correlation between the PM<sub>2.5</sub> measurements by PurpleAir sensors and regulatory stations.

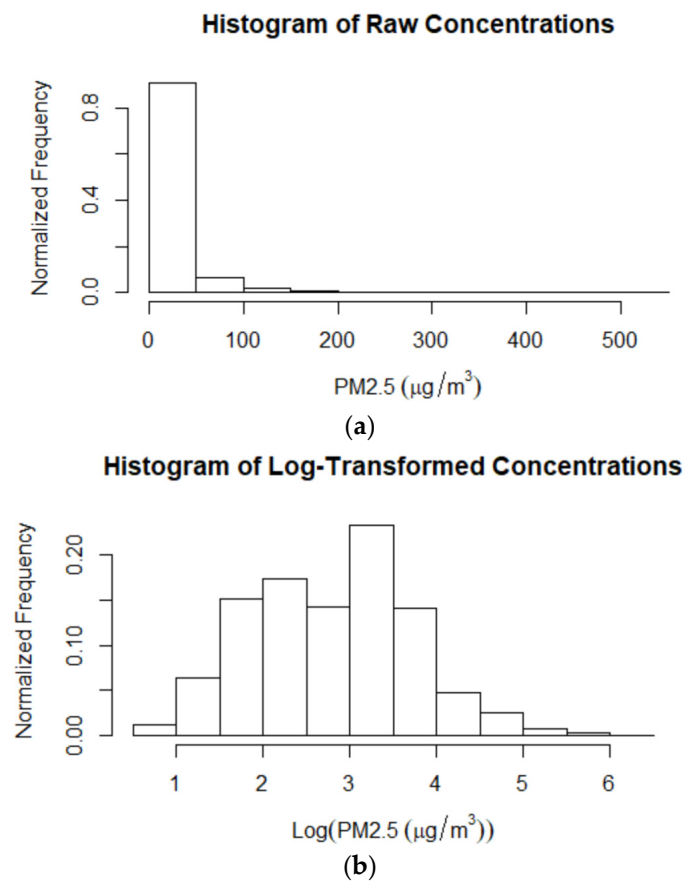

**Figure SI-2.** Histogram of raw and log-transformed concentration values.

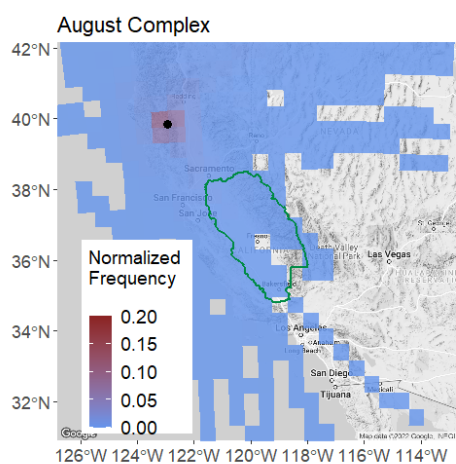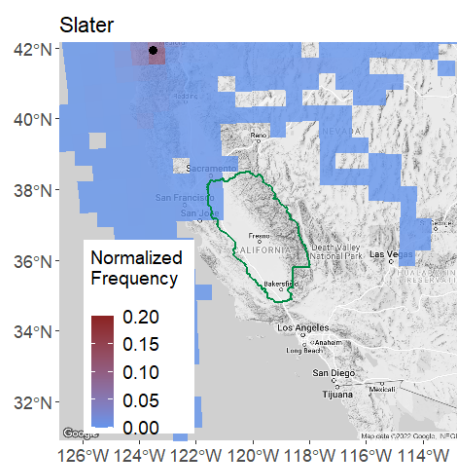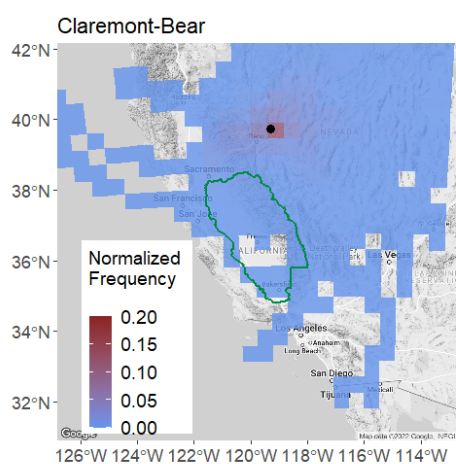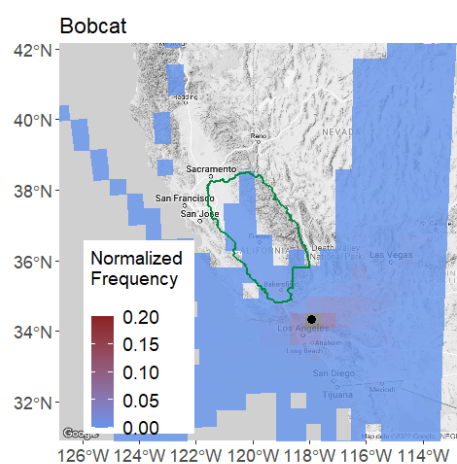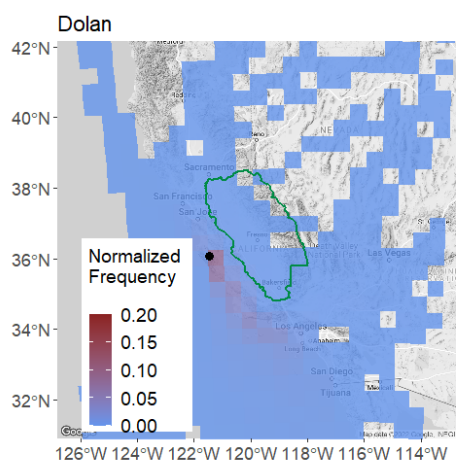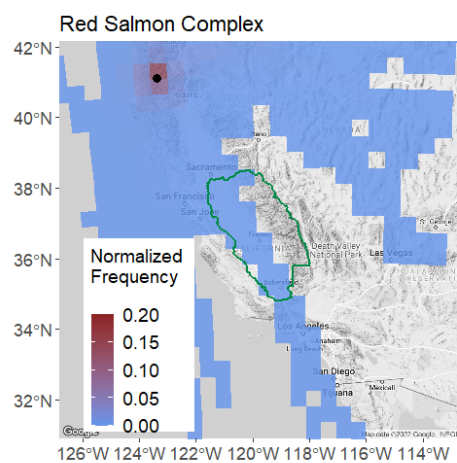

**Figure SI-3.** Frequency of forward trajectories starting from wildfire locations.
